# Supplementary material
Source: HighWire-hosted journal article supplement (https://bmjopenquality.bmj.com/highwire/filestream/135899/field_highwire_adjunct_files/0/ds2643.docx)
Supplement: ds2643.docx [file ds2643.docx]

Handover Improvement Initiative

Medical Weekend Handover

Grade (F1/F2/CT/ST/SpR): Speciality:

1. Overall current weekend handover is effective.

| Strongly Disagree | Disagree | Neither | Agree | Strongly Agree |
| --- | --- | --- | --- | --- |

2. Current weekend handover ensures patient safety.

| Strongly Disagree | Disagree | Neither | Agree | Strongly Agree |
| --- | --- | --- | --- | --- |

3. Current weekend handover allows junior doctors to work efficiently.

| Strongly Disagree | Disagree | Neither | Agree | Strongly Agree |
| --- | --- | --- | --- | --- |

4. In your opinion, what are the issues with current weekend handover?

5. Current weekend handover needs improvement.

| Strongly Disagree | Disagree | Neither | Agree | Strongly Agree |
| --- | --- | --- | --- | --- |

6. How do you think weekend handover could be improved?

7. Morning weekend handover meeting at 9am is well organised.

| Strongly Disagree | Disagree | Neither | Agree | Strongly Agree |
| --- | --- | --- | --- | --- |

8. You feel well supported during your weekend on call duties.

| Strongly Disagree | Disagree | Neither | Agree | Strongly Agree |
| --- | --- | --- | --- | --- |

9. There was adequate handover teaching at your trust induction.

| Strongly Disagree | Disagree | Neither | Agree | Strongly Agree |
| --- | --- | --- | --- | --- |
